# Supplementary material for: Enabling narrowband cyan photoluminescence and long-lasting ultraviolet-A persistent luminescence in Bi3+ single-doped Sr3Sc2Ge3O12 phosphors by selective site occupation
Source: Royal Society of Chemistry journal article supplement (doi:10.1039/d2tc02898k), 2022-01-01
Supplement: d2tc02898k1.pdf [file d2tc02898k1.pdf]

## Supporting Information

### **Enabling narrowband cyan photoluminescence and long-lasting ultraviolet-A persistent luminescence in Bi<sup>3+</sup> single-doped Sr<sub>3</sub>Sc<sub>2</sub>Ge<sub>3</sub>O<sub>12</sub> phosphor by selective site occupation**

Shihai Miao,<sup>a</sup> Yanjie Liang,<sup>\*a</sup> Dongxun Chen,<sup>a</sup> Shao Yan,<sup>a</sup> Jingwei Liu,<sup>a</sup> Weili Wang,<sup>a</sup> Jianqiang Bi<sup>a</sup>

<sup>a</sup>Key Laboratory for Liquid-Solid Structure Evolution and Processing of Materials, Ministry of Education, Shandong University, Jinan 250061, P. R. China

\*Corresponding author: YJ Liang

E-mail: [yanjie.liang@sdu.edu.cn](mailto:yanjie.liang@sdu.edu.cn)

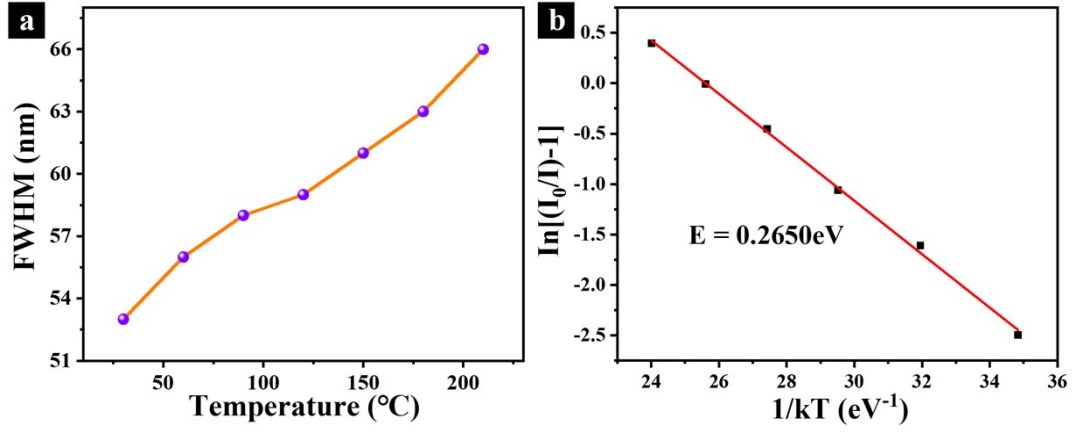

**Fig. S1.** (a) The FWHM values  $\text{Sr}_3\text{Sc}_2\text{Ge}_3\text{O}_{12}:15\%\text{Bi}^{3+}$  phosphor under different temperatures. (b) The plot of  $\ln[(I_0/I)-1]$  versus  $1/kT$ .

The activation energy  $\Delta E$  can be obtained using the following equation:

$$I_T = \frac{I_0}{1 + c \exp\left(-\frac{\Delta E}{kT}\right)} \quad (1)$$

where  $T$  represents the temperature,  $k$  is the Boltzmann constant ( $8.629 \times 10^{-5} \text{ eV/k}$ ),  $c$  is a constant,  $I_0$  and  $I_T$  are the initial PL intensity of the samples at room temperature and different temperatures, respectively. The Plot of  $\ln[I_0/I-1]$  versus  $1/kT$  is given in Fig. S1. On the basis of Eq. 1,  $\Delta E$  values of  $\text{Sr}_3\text{Sc}_2\text{Ge}_3\text{O}_{12}:15\%\text{Bi}^{3+}$  sample was calculated to be  $0.2650 \text{ eV}$ .

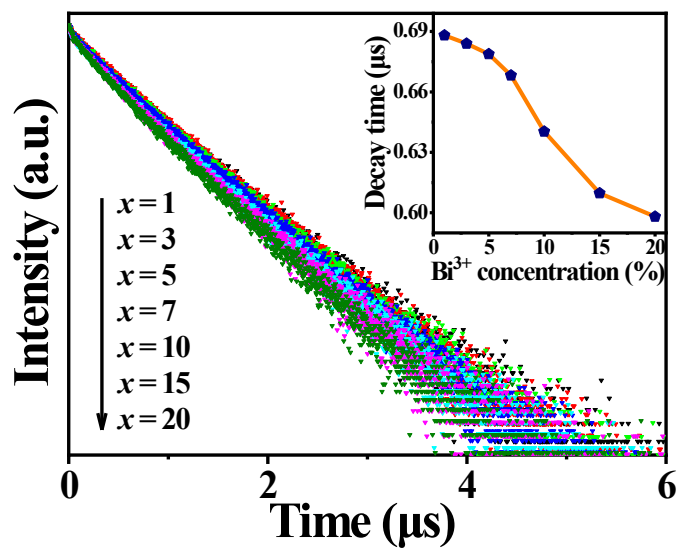

**Fig. S2.** The fluorescence decay curves of  $\text{Sr}_3\text{Sc}_2\text{Ge}_3\text{O}_{12}:\text{Bi}^{3+}$  phosphors under different  $\text{Bi}^{3+}$  contents by monitoring 487 nm emission upon 375-nm-laser excitation.

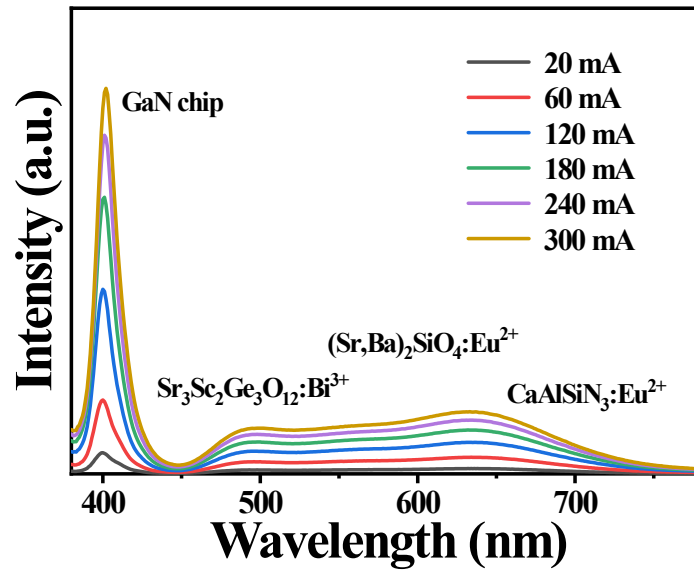

**Fig. S3.** Emission spectra of the LED fabricated with  $\text{Sr}_3\text{Sc}_2\text{Ge}_3\text{O}_{12}:\text{Bi}^{3+}$ , yellow phosphor  $(\text{Sr},\text{Ba})_2\text{SiO}_4:\text{Eu}^{2+}$  and red phosphor  $\text{CaAlSiN}_3:\text{Eu}^{2+}$  on a near-UV LED chip ( $\lambda = 395 \text{ nm}$ ) under different currents.

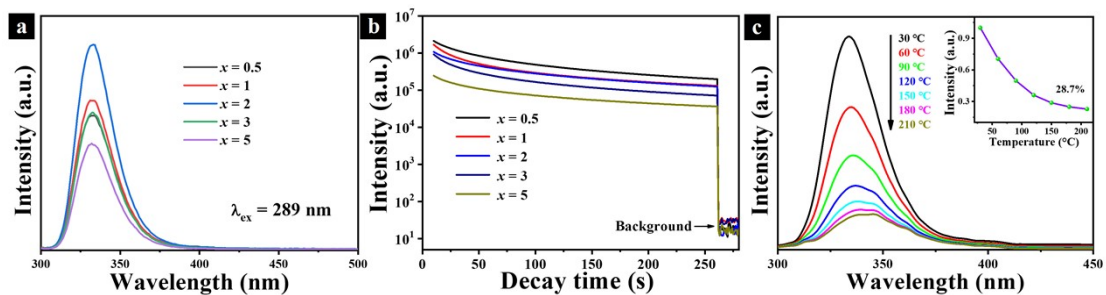

**Fig. S4.** (a) Emission spectra of  $\text{Sr}_3\text{Sc}_2\text{Ge}_3\text{O}_{12}:x\%\text{Bi}^{3+}$  ( $x = 0.5, 1, 2, 3$  and  $5$ ) phosphors under the excitation of  $289$  nm. (b) Persistent luminescence decay curves of  $\text{Sr}_3\text{Sc}_2\text{Ge}_3\text{O}_{12}:x\%\text{Bi}^{3+}$  samples monitored at  $333$  nm after irradiation by a  $254$  nm UV lamp for  $10$  min. (c) The temperature dependent emission spectra of  $\text{Sr}_3\text{Sc}_2\text{Ge}_3\text{O}_{12}:0.5\%\text{Bi}^{3+}$  phosphor. Inset: the temperature dependence of relative intensity.

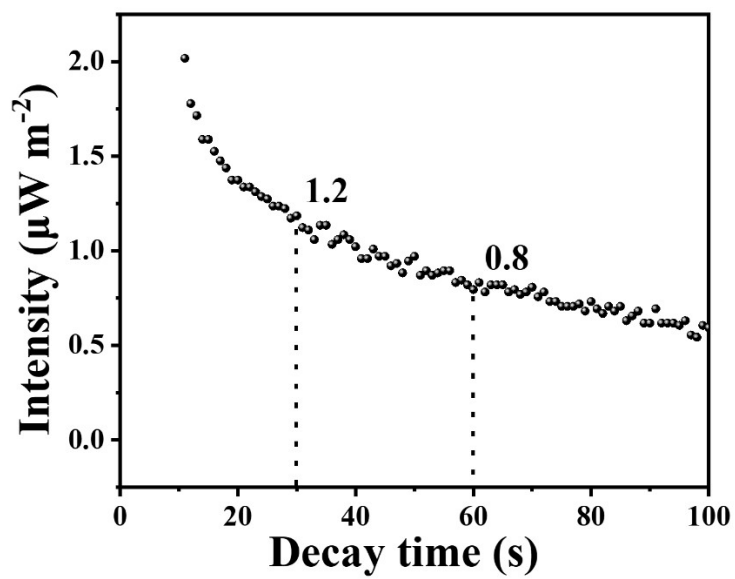

**Fig. S5.** The luminescence power intensity of  $\text{Sr}_3\text{Sc}_2\text{Ge}_3\text{O}_{12}:0.5\%\text{Bi}^{3+}$  phosphor monitored at 333 nm.

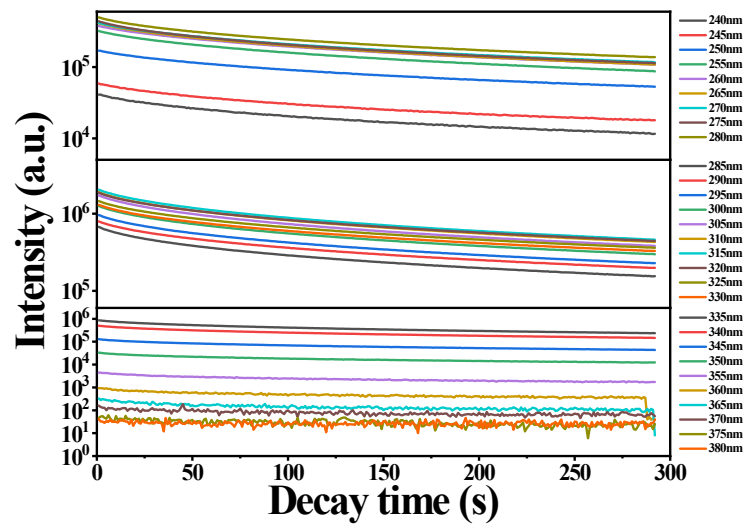

**Fig. S6.** Persistent luminescence decay curves of  $\text{Sr}_3\text{Sc}_2\text{Ge}_3\text{O}_{12}:0.5\%\text{Bi}^{3+}$  phosphor irradiated by 240–380 nm lights for 5 min. The monitoring wavelength is 333 nm.

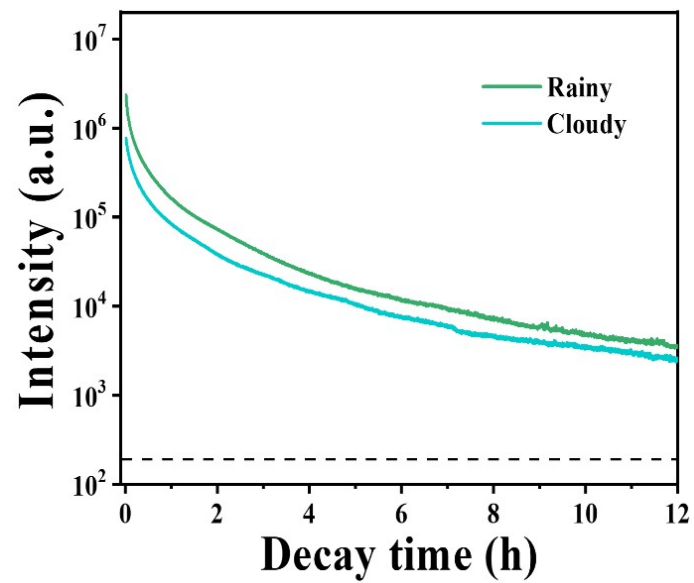

**Fig. S7.** UVA persistent luminescence decay curves after irradiation with direct sunlight for 30 min under different weather conditions.



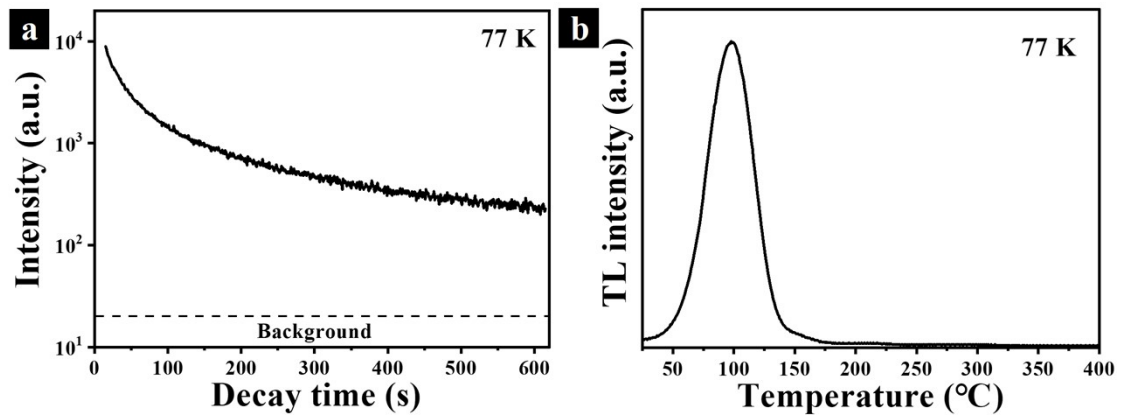

**Fig. S8.** (a) Persistent luminescence decay curve of  $\text{Sr}_3\text{Sc}_2\text{Ge}_3\text{O}_{12}:\text{Bi}^{3+}$  phosphor irradiated by 310 nm light for 10 min at 77 K. The monitoring wavelength is 333 nm. (b) TL spectra of  $\text{Sr}_3\text{Sc}_2\text{Ge}_3\text{O}_{12}:\text{Bi}^{3+}$  phosphor obtained by illuminating with 310 nm light for 10 min at 77 K.

**Table S1** Refined structural parameters and cell parameter values of  $\text{Sr}_3\text{Sc}_2\text{Ge}_3\text{O}_{12}:\text{Bi}^{3+}$  from the Rietveld refinement.

| Formula             | $\text{Sr}_3\text{Sc}_2\text{Ge}_3\text{O}_{12}$        |           |            |           |
|---------------------|---------------------------------------------------------|-----------|------------|-----------|
| Crystal system      | Cubic                                                   |           |            |           |
| Space group         | $Ia-3d$ (230)                                           |           |            |           |
| Cell parameters     | $a = b = c = 12.786148 \text{ \AA}$                     |           |            |           |
|                     | Alpha = 90                                              | Beta = 90 | Gamma = 90 |           |
| Cell volume         | $V = 2090.351 \text{ \AA}^3$                            |           |            |           |
| Z                   | 8                                                       |           |            |           |
| Reliability factors | $R_p = 6.41\%$ , $R_{wp} = 9.76\%$ and $\chi^2 = 4.074$ |           |            |           |
| Atom                | x/a                                                     | y/b       | z/c        | Ui/Ue*100 |
| Sr1                 | 0.125000                                                | 0.000000  | 0.250000   | 0.00      |
| Sc1                 | 0.000000                                                | 0.000000  | 0.000000   | -1.60     |
| Ge1                 | 0.375000                                                | 0.000000  | 0.250000   | 0.36      |
| O1                  | 0.963273                                                | 0.052963  | 0.142525   | 2.35      |

**Table S2** Chromaticity parameters of the fabricated white LED under different diving currents.

| Current (mA) | CIE coordinates (x, y) | CCT (K) | CRI  |
|--------------|------------------------|---------|------|
| 20           | 0.4024, 0.4046         | 3672    | 95.9 |
| 60           | 0.4017, 0.4020         | 3667    | 96.1 |
| 120          | 0.3971, 0.3931         | 3703    | 95.9 |
| 180          | 0.3917, 0.3857         | 3775    | 95.3 |
| 240          | 0.3880, 0.3806         | 3828    | 94.8 |
| 300          | 0.3851, 0.3763         | 3870    | 94.3 |
